# Supplementary material
Source: PubMed Central journal article supplement (PMC3005563)
Supplement: NIHMS251530-supplement-Fig_S5.pdf [file NIHMS251530-supplement-Fig_S5.pdf]

**$\Delta\Psi_m$  initially increases when cells are exposed to apoptotic stress**

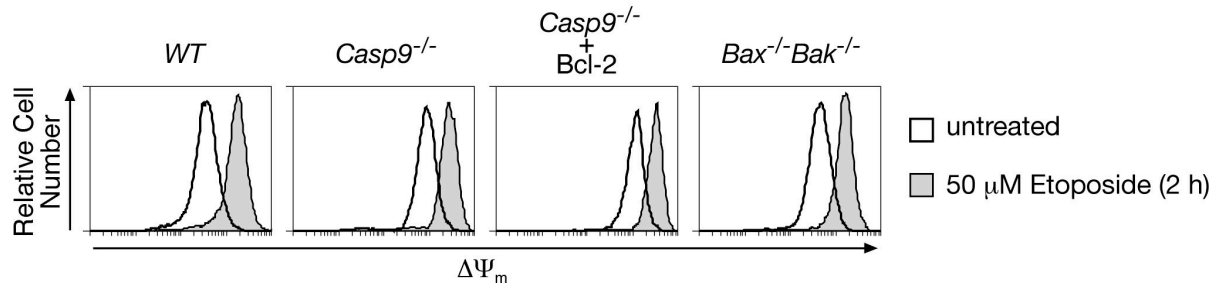

WT, Casp9<sup>-/-</sup>, and Bax<sup>-/-</sup>Bak<sup>-/-</sup> MEFs and Casp9<sup>-/-</sup> MEFs stably overexpressing Bcl-2 were either left untreated or exposed to 50 μM etoposide for 2 h, then stained with DiOC<sub>6</sub>(3). ΔΨ<sub>m</sub> increased similarly in the cells, irrespective of their genotype.
