# Supplementary material
Source: PubMed Central journal article supplement (PMC3005563)
Supplement: NIHMS251530-supplement-Fig_S6.pdf [file NIHMS251530-supplement-Fig_S6.pdf]

***Casp9*<sup>-/-</sup> cells that lose part of their  $\Delta\Psi_m$  after treatment with staurosporine are no longer clonogenic**

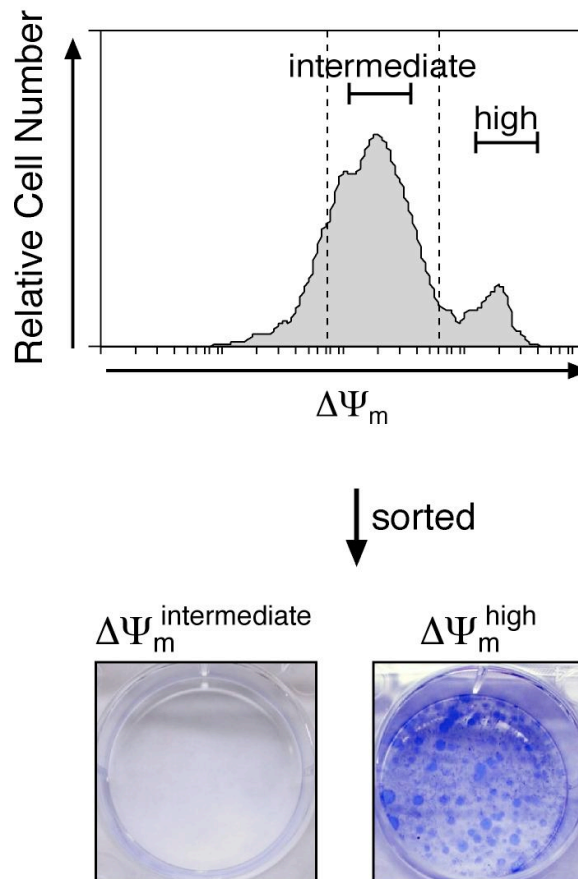

*Casp9*<sup>-/-</sup> MEFs were exposed to 2  $\mu\text{M}$  staurosporine for 8 h, then washed and cultured for a further 24 h before they were stained with DiOC<sub>6</sub>(3) and sorted into  $\Delta\Psi_m^{\text{high}}$  and  $\Delta\Psi_m^{\text{intermediate}}$  populations. The sorted cells were seeded at equal density and cultured for 7 days to allow colonies to form.
