# Supplementary material
Source: PubMed Central journal article supplement (PMC3005563)
Supplement: NIHMS251530-supplement-Fig_S7.pdf [file NIHMS251530-supplement-Fig_S7.pdf]

**Absence of autoimmune anti-nuclear antibodies in sera of mice reconstituted with *Casp9*<sup>-/-</sup> hematopoietic stem cells**

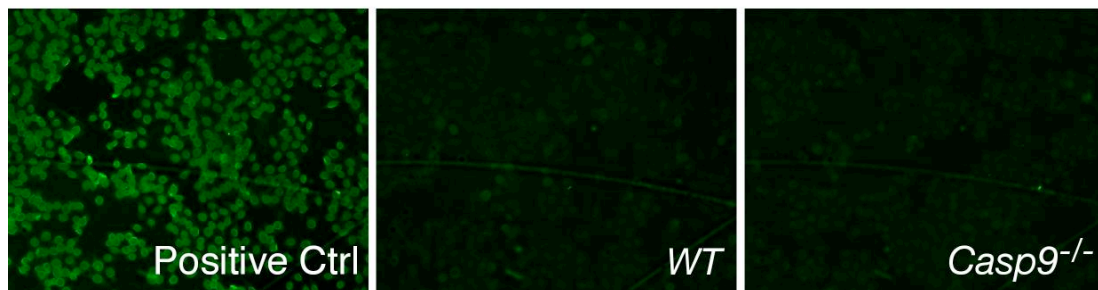

The sera from mice reconstituted with *WT* or *Casp9*<sup>-/-</sup> fetal liver stem cells (20 wk after reconstitution) was tested for anti-nuclear antibodies by indirect-immunofluorescence on HEP-2 liver cells. Serum from *Lyn*<sup>-/-</sup> mice, which develop an autoimmune disease similar to systemic lupus erythematosus and have elevated titers of anti-nuclear antibodies<sup>44</sup>, served as a positive control.
